# Supplementary material for: Luminescence properties of Bi 3+ /Sm 3+ co-doped K 3 Gd 5 (PO 4 ) 6 phosphors for self-referencing optical thermometry
Source: Royal Society of Chemistry journal article supplement (doi:10.1039/d4ra06205a), 2024-01-01
Supplement: d4ra06205a1.pdf [file d4ra06205a1.pdf]

## Supporting Information

### Luminescence properties of $\text{Bi}^{3+}/\text{Sm}^{3+}$ co-doped $\text{K}_3\text{Gd}_5(\text{PO}_4)_6$ phosphors for self-referencing optical thermometry

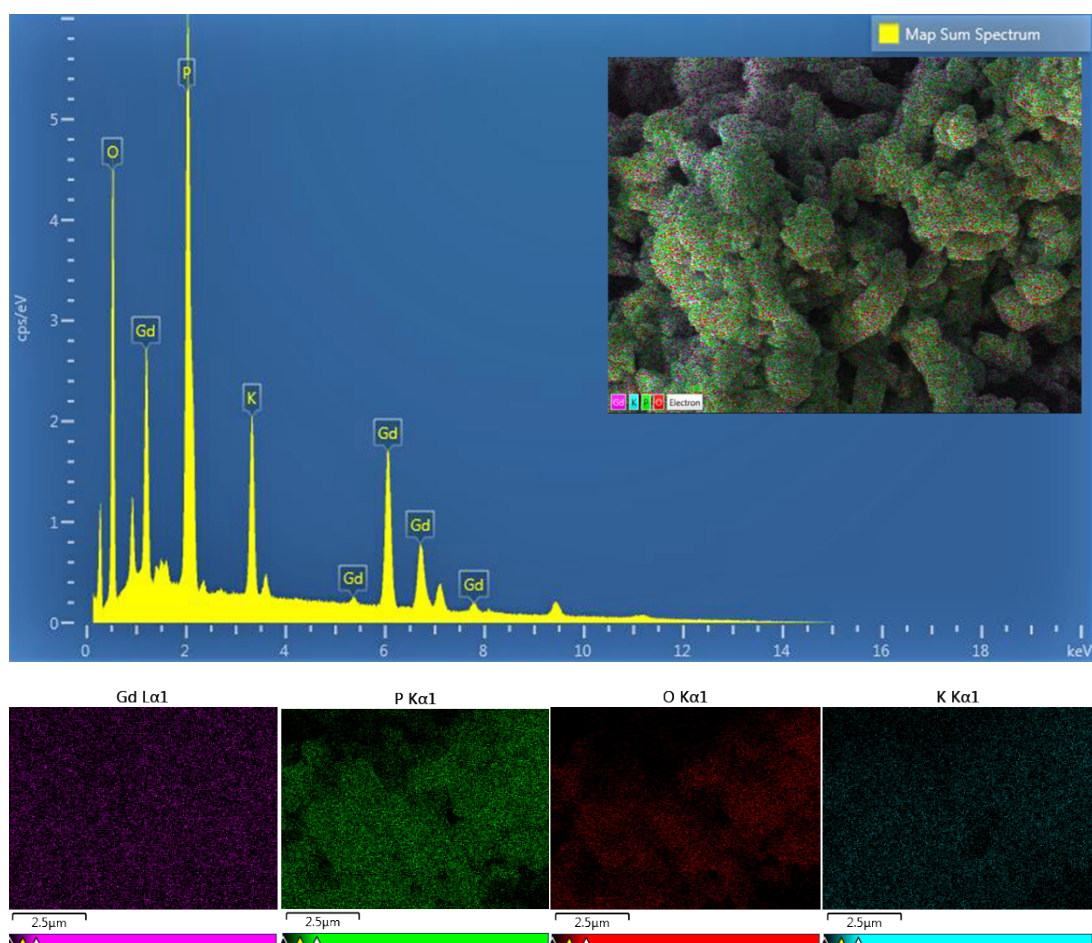

Figure S1 EDS mapping of  $\text{KGP}:\text{Bi}^{3+},\text{Sm}^{3+}$  phosphor.

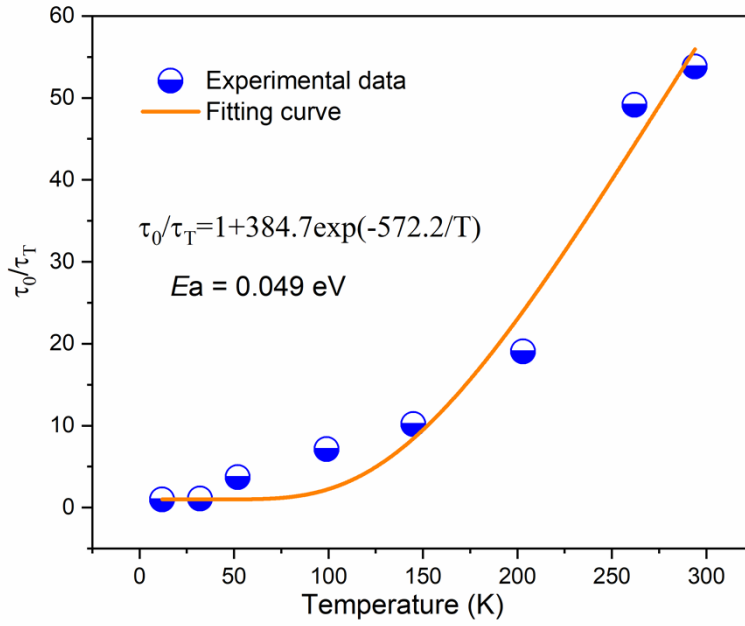

Figure S2 Plot of  $\tau_0/\tau_T$  versus T for the calculation of  $E_a$  in KGP:Bi<sup>3+</sup> phosphor.

Table S1 EDS of KGP:Bi<sup>3+</sup>,Sm<sup>3+</sup> phosphor.

| Element | Apparent Concentration | k Ratio | Wt%    | Wt% Sigma | Standard Label |
|---------|------------------------|---------|--------|-----------|----------------|
| O       | 2.43                   | 0.00817 | 18.17  | 0.17      | SiO2           |
| P       | 1.78                   | 0.00995 | 13.04  | 0.14      | GaP            |
| K       | 0.97                   | 0.00820 | 7.71   | 0.09      | KBr            |
| Gd      | 5.70                   | 0.05701 | 61.08  | 0.25      | Gd (v)         |
| Total:  |                        |         | 100.00 |           |                |

Table S2 CIE coordination of KGP:Bi<sup>3+</sup>,Sm<sup>3+</sup> phosphor in the low temperature range.

| Temperature (K) | Coordinates     |
|-----------------|-----------------|
| 11              | (0.4553,0.3573) |
| 44              | (0.4464,0.3629) |
| 77              | (0.3753,0.3357) |
| 114             | (0.3217,0.2918) |
| 155             | (0.2880,0.2730) |
| 182             | (0.2708,0.2556) |
| 225             | (0.2732,0.2564) |
| 262             | (0.2979,0.2633) |
| 295             | (0.3811,0.3272) |

Table S3 CIE coordination of KGP:Bi<sup>3+</sup>,Sm<sup>3+</sup> phosphor in the high temperature range.

| Temperature (K) | Coordinates     |
|-----------------|-----------------|
| 295             | (0.3811,0.3272) |
| 325             | (0.4266,0.3539) |
| 358             | (0.4689,0.3714) |
| 396             | (0.4994,0.3846) |
| 423             | (0.5169,0.3946) |
| 455             | (0.5269,0.4014) |
| 488             | (0.5331,0.4055) |
| 523             | (0.5397,0.4097) |
